# Supplementary material for: Dilated fixed pupils and respiratory failure: a rare clinical course of Lambert-Eaton myasthenic syndrome
Source: HighWire-hosted journal article supplement (doi:10.1136/bmjno-2023-000426), 2023-08-01
Supplement: bmjno-2023-000426supp002_data_supplement.pdf [file bmjno-2023-000426supp002_data_supplement.pdf]

**Online supplementary file 2: Detailed course regarding the pupillary reflexes:**

At day 0, when the patient visited the ER for the first time, her pupils were reported to be normal/equal and reactive to light. She came back to the ER 11 days later and was hospitalized. We could not find information regarding pupil examination at this moment in time.

At day 12 (around noon) she suffered a cardiac arrest and was resuscitated. The patient received a single dose of rocuronium 100mg prior to intubation. It was not stated whether the pupils were normal or abnormal directly prior to or after this event. Six hours later (day 12 around 18:00) it was first reported at the ICU that she had a mild anisocoria, however with intact light reflexes. Another 12 hours later (day 13 around 06:00) it was described that the response to light was decreasing/slower compared to the evening before and that her pupils were abnormally wide, with near loss of the light reflex sometime during that day.

At day 14 it was reported for the first time that her pupils were deformed and not clearly reactive to light (however with intact consciousness, E3-4M6Vtube). At this day the neurology department was consulted. At day 16, 3,4-DAP was started. At day 20 return of a sluggish light response of only the right pupil was reported, followed some days later by the left pupil

At day 45, her pupils were still wide (approximately 5mm) and only minimally reactive to light.
